# Supplementary material
Source: PubMed Central journal article supplement (PMC6253368)
Supplement: rspb20181237supp1.pdf [file rspb20181237supp1.pdf]

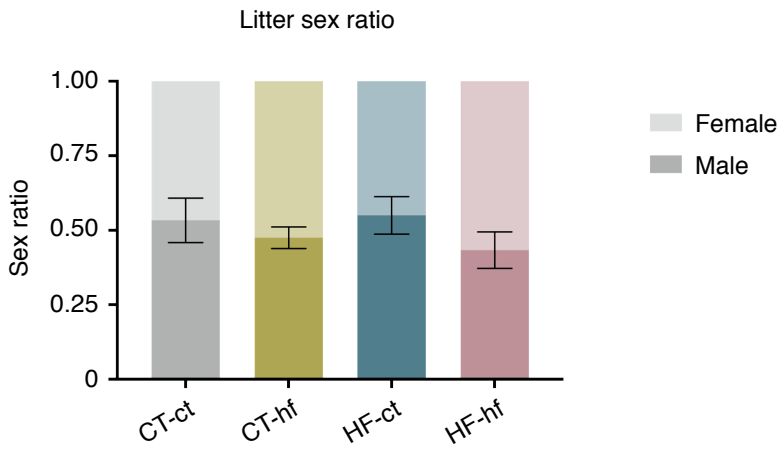

Supplementary Material, Figure 1

**Table S1.** Effect of (F0 diet)\*(F1 *in utero* exposure) interaction on maternal behavior.

|                                   | Estimate | Std. Error | z value | Pr(> z ) |
|-----------------------------------|----------|------------|---------|----------|
| <b>Interactive behaviors</b>      |          |            |         |          |
| All interactive behaviors         |          |            |         |          |
| F0 diet                           | -0.1284  | 0.1605     | -0.8001 | 0.4237   |
| F1 exposure                       | -0.2141  | 0.1642     | -1.3039 | 0.1923   |
| F0*F1                             | 0.0180   | 0.2720     | 0.0663  | 0.9471   |
| In the nest with pups, not moving |          |            |         |          |
| F0 diet                           | -0.3567  | 0.2012     | -1.7729 | 0.0763   |
| F1 exposure                       | -0.6604  | 0.2212     | -2.9855 | 0.0028   |
| F0*F1                             | 0.2549   | 0.3797     | 0.6713  | 0.5020   |
| In the nest with pups, moving     |          |            |         |          |
| F0 diet                           | 0.2985   | 0.2752     | 1.0846  | 0.2781   |
| F1 exposure                       | 0.4480   | 0.2669     | 1.6784  | 0.0933   |
| F0*F1                             | -0.4163  | 0.4074     | -1.0217 | 0.3069   |
| Nest-building                     |          |            |         |          |
| F0 diet                           | -0.2624  | 0.4206     | -0.6238 | 0.5328   |
| F1 exposure                       | -0.6190  | 0.4688     | -1.3205 | 0.1867   |
| F0*F1                             | -17.9067 | 2858.7661  | -0.0063 | 0.9950   |
| <b>Non-interactive behaviors</b>  |          |            |         |          |
| Exploring                         |          |            |         |          |
| F0 diet                           | 0.4055   | 0.2752     | 1.4731  | 0.1407   |
| F1 exposure                       | 0.5978   | 0.2654     | 2.2523  | 0.0243   |
| F0*F1                             | -0.1054  | 0.3712     | -0.2838 | 0.7765   |
| Wall-rearing                      |          |            |         |          |
| F0 diet                           | 0.6931   | 0.8660     | 0.8004  | 0.4235   |
| F1 exposure                       | 1.0986   | 0.8165     | 1.3455  | 0.1785   |
| F0*F1                             | -0.6931  | 1.1180     | -0.6200 | 0.5353   |

Results from the Poisson generalized linear model for predicting the given maternal behavior using the predictors F0 diet, F1 *in utero* exposure, and (F0 diet)\*(F1 *in utero* exposure), referred to as F0\*F1 in the Table, with CT, ct and CT-ct as the reference groups, respectively.
